# Supplementary material for: A thiourea resin polymer as a multifunctional modifier of the buried interface for efficient perovskite solar cells with reduced lead leakage
Source: Royal Society of Chemistry journal article supplement (doi:10.1039/d2qm00703g), 2022-01-01
Supplement: d2qm00703g1.pdf [file d2qm00703g1.pdf]

## **Thiourea Resin Polymer as a Multifunctional Modifier of Buried Interface for Efficient Perovskite Solar Cells with reduced lead leakage**

Wenjing Hou,<sup>\*a</sup> Rujia Hu,<sup>a</sup> Sheng Zhu,<sup>a</sup> Jin kang,<sup>\*b</sup> Yaoming Xiao<sup>c</sup> Gaoyi Han<sup>\*a</sup>

*<sup>a</sup> Institute of Molecular Science, Key Laboratory of Chemical Biology and Molecular Engineering of Education Ministry, Key Laboratory of Materials for Energy Conversion and Storage of Shanxi Province, State Key Laboratory of Quantum Optics and Quantum Optics Devices, Shanxi University, Taiyuan 030006, P. R. China.*

*<sup>b</sup> Department of Chemistry and Chemical Engineering, Collaborative Innovation Center for Functional Chemicals, High Value Fine Chemicals Research Center, Jinzhong University, Jinzhong, 030619, Shanxi China;*

*<sup>c</sup> College of Chemical Engineering and Materials Science, Quanzhou Normal University, Quanzhou 362000, P. R. China.*

[\*] Corresponding authors.

E-mail: houwenjing@sxu.edu.cn (Wenjing Hou); kangjin@jzxy@edu.cn (Jin Kang);

han\_gaoyis@sxu.edu.cn (Gaoyi Han)

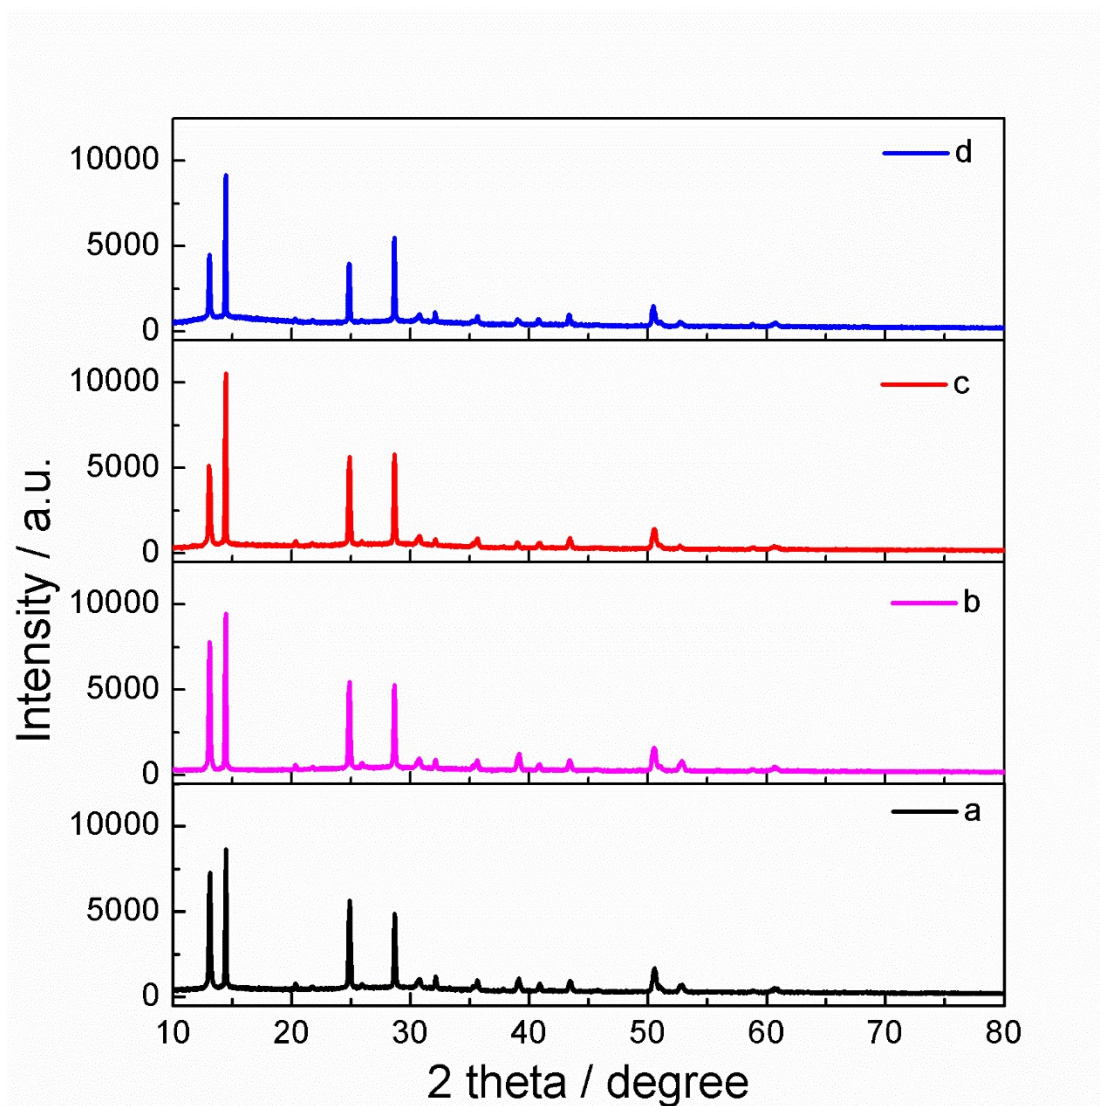

**Fig. S1** XRD patterns of perovskite films deposited on the SnO<sub>2</sub> ETLs modified with different concentration of TSU: a (0.00 mg mL<sup>-1</sup>), b (0.5 mg mL<sup>-1</sup>), c (0.10 mg mL<sup>-1</sup>) and d (0.15 mg mL<sup>-1</sup>), respectively.

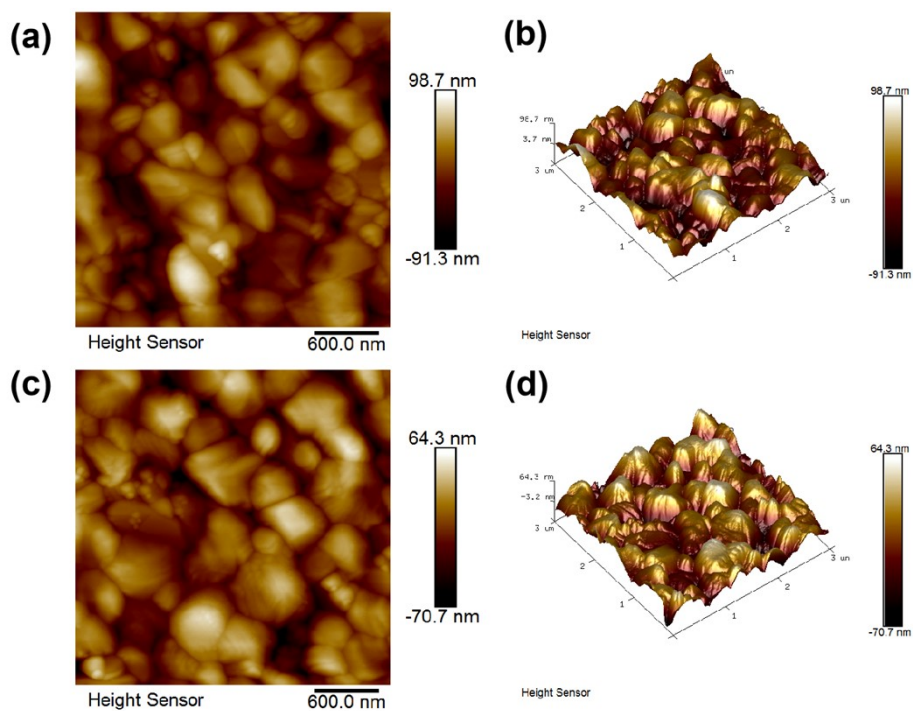

**Fig. S2** 2D and 3D AFM images of perovskite films based on different substrates (a, b) SnO<sub>2</sub> and (c, d) TSU-modified SnO<sub>2</sub>.

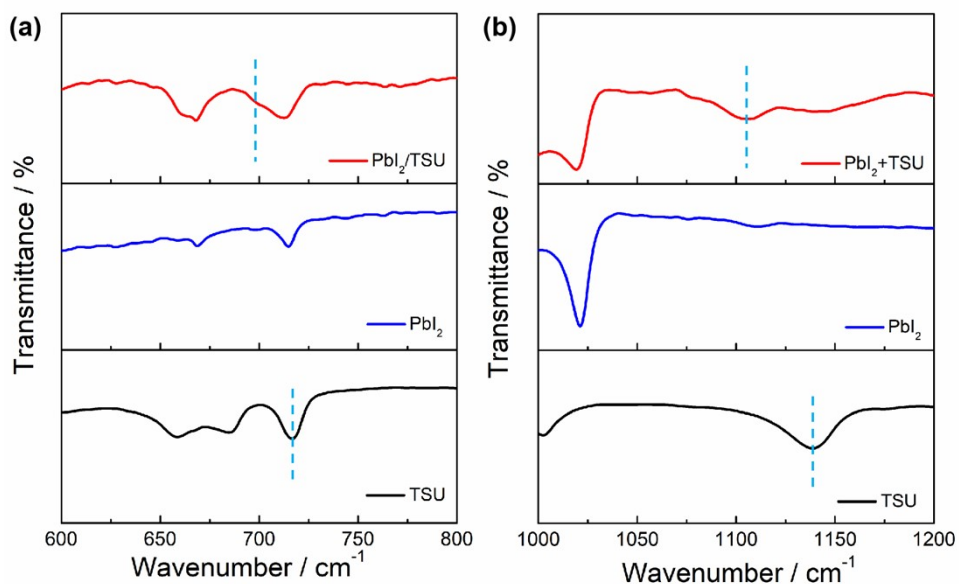

**Fig. S3** FTIR spectrum of TSU, PbI<sub>2</sub>, and PbI<sub>2</sub>/TSU within different range: (a) 600~800 nm, and (b) 1000-1200 nm.

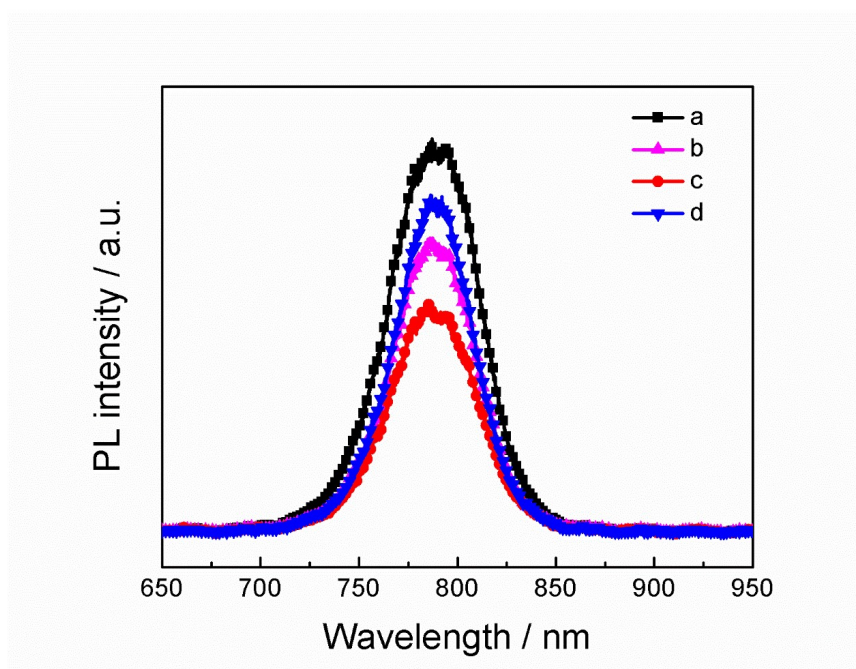

**Fig. S4** The steady PL spectra of the perovskite films deposited on the SnO<sub>2</sub> ETLs modified with different concentration of TSU.

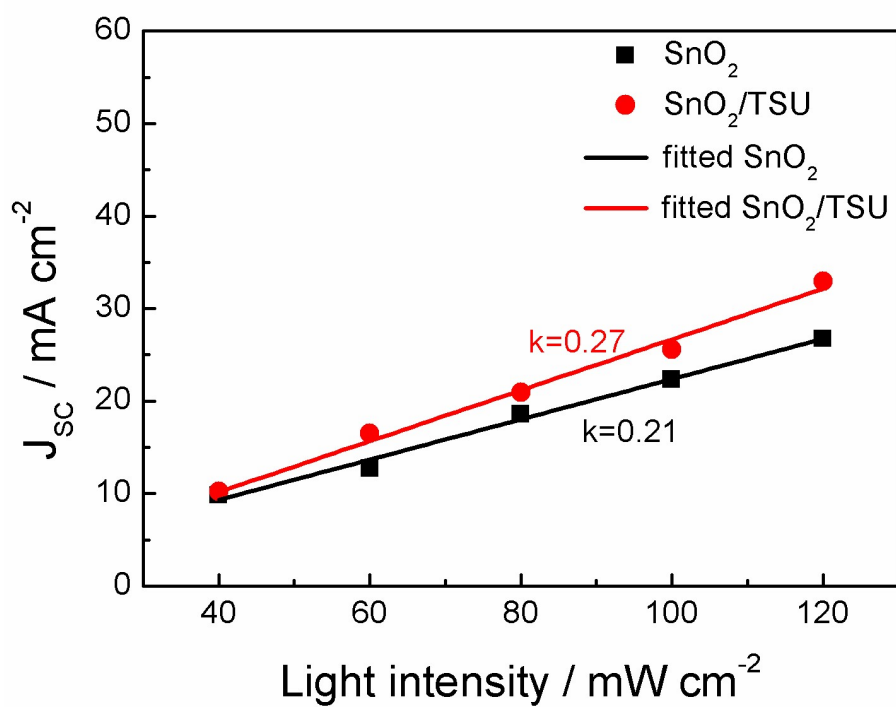

**Fig. S5**  $J_{SC}$  dependence on light intensity for the devices based on the SnO<sub>2</sub> and TSU-modified SnO<sub>2</sub> substrates.

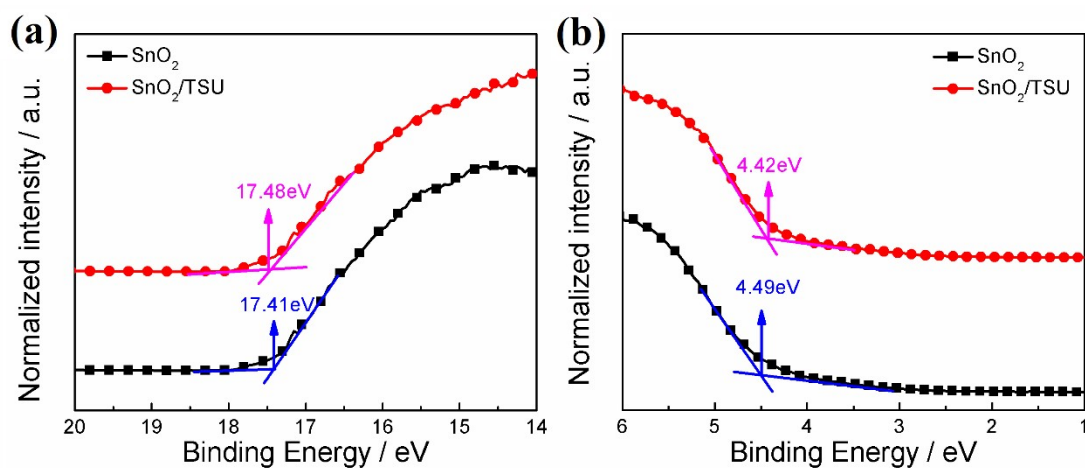

**Fig. S6** UPS spectra of  $\text{SnO}_2$  and TSU-modified  $\text{SnO}_2$  ETLs on ITO substrates: (a) binding energy cutoff ( $E_{\text{cutoff}}$ ), (b) the binding energy onset ( $E_{\text{onset}}$ )

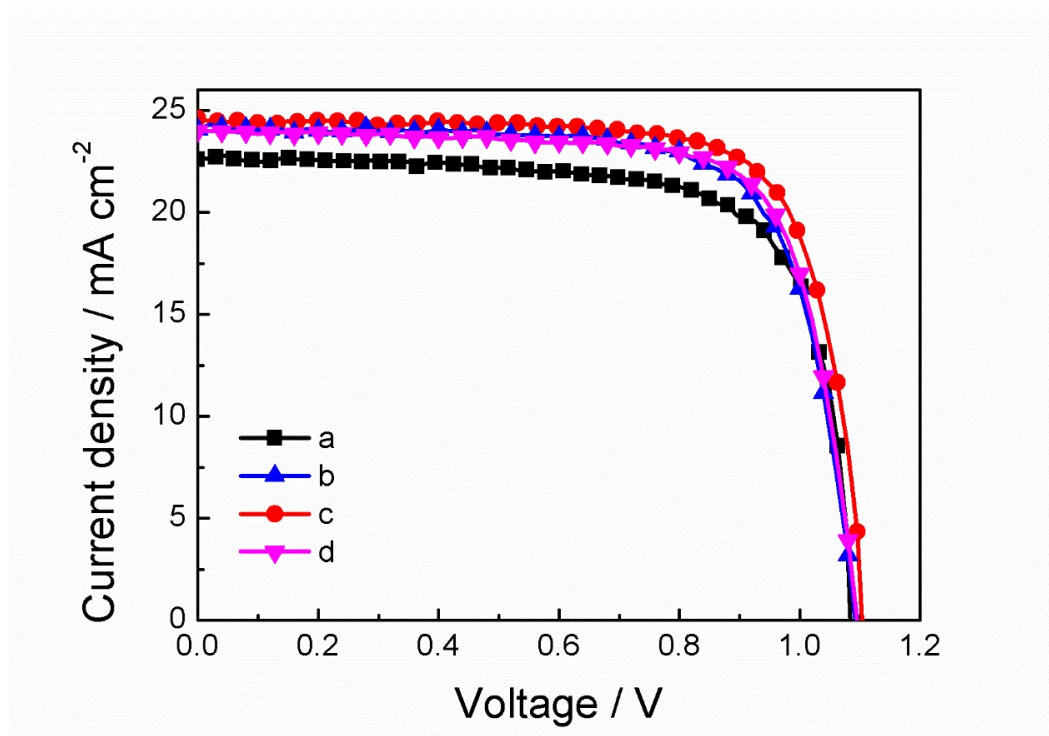

**Fig. S7** J-V curves of the different devices based on different content of TSU modification with reverse scan rate of  $100 \text{ mV s}^{-1}$ .

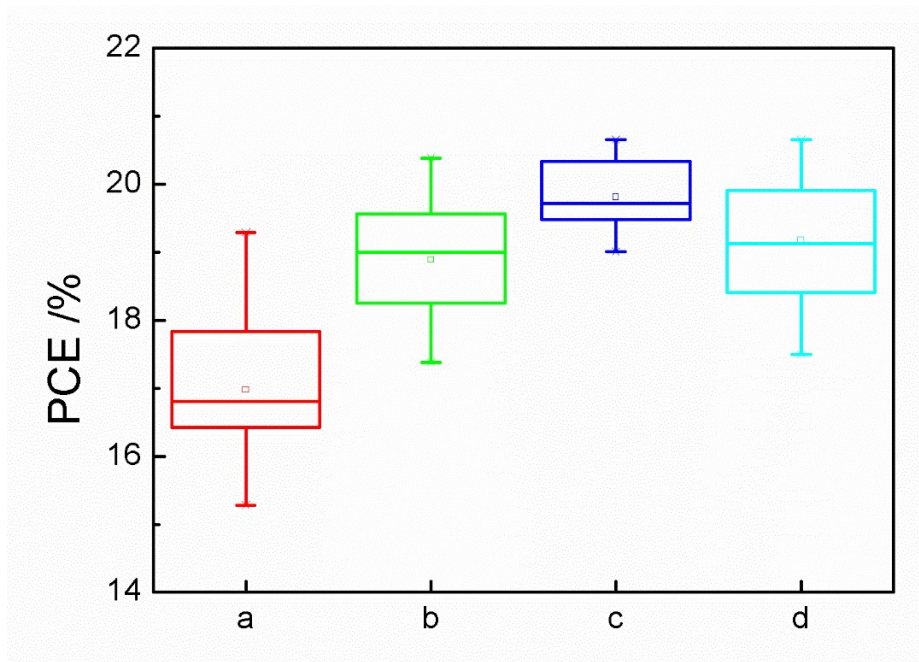

**Fig. S8** The statistical PCE of devices based on different content of TSU modification.

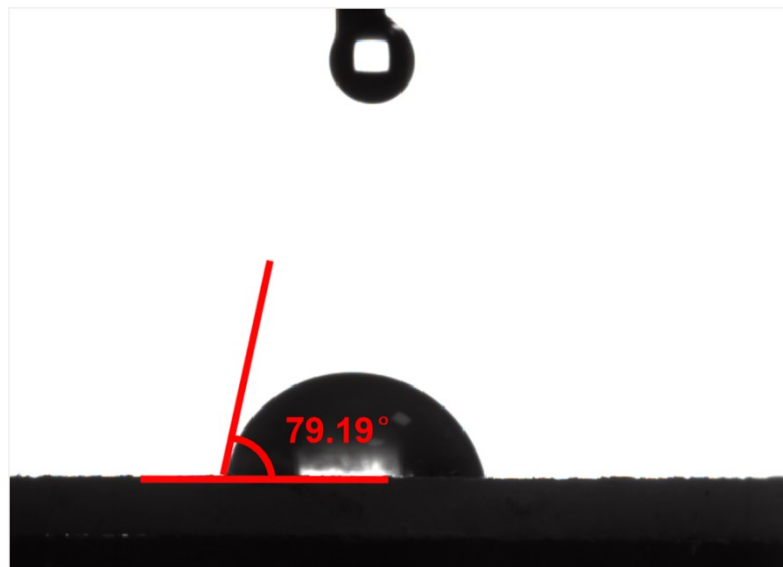

**Fig. S9** The contact angle of TSU.

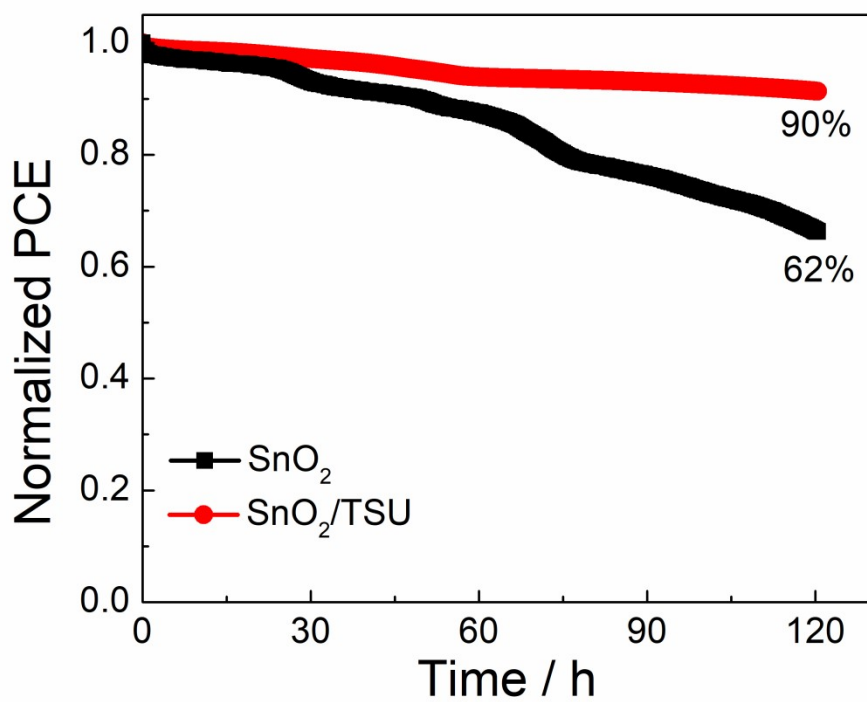

**Fig. S10** The steady-state PCE versus time for the best-performing devices deposited on SnO<sub>2</sub> and TSU-modified SnO<sub>2</sub> substrates at the maximum power point.
